# Supplementary material
Source: publisher figshare collection journal article supplement (https://gsajournals.figshare.com/ndownloader/files/22441136)
Supplement: Supplementary file 1 [file 22441136]

## Sheet: Hyphae
Fungus: Metarhizium anisopliae:Blastospores (liquid culture) vs Hyphae (solid culture)
	ENRICHED TERMS IN HYPHAE
	GO – Gene ontology		PFAM – Protein family			ko Pathway
	Biological Process		PF00225	Kinesin motor domain		KO03030	DNA replication
GO:0007018	microtubule-based movement		PF01636	Phosphotransferase enzyme family		KO03430	Mismatch repair
GO:0006260	DNA replication		PF00069	Protein kinase domain		KO03410	Base excision repair
GO:0005975	carbohydrate metabolic process		PF14214	Helitron helicase-like domain at N-terminus		KO03440	Homologous recombination
GO:0051301	cell division		PF01822	WSC domain		KO03420	Nucleotide excision repair
GO:0006310	DNA recombination		PF01764	Lipase (class 3)		KO04111	Cell cycle yeast
GO:0006281	DNA repair		PF05970	PIF1-like helicase		KO00240	Pyrimidine metabolism
GO:0016192	vesicle-mediated transport		PF06985	Heterokaryon incompatibility protein (HET)		KO04145	Phagosome
GO:0043386	mycotoxin biosynthetic process		PF08022	FAD-binding domain		KO03050	Proteasome
GO:0006511	ubiquitin-dependent protein catabolic process		PF00083	Sugar (and other) transporter		KO04144	Endocytosis
GO:0006629	lipid metabolic process		PF01794	Ferric reductase like transmembrane component		KO00513	Various types of Nglycan biosynthesis
GO:0000770	peptide pheromone export		PF00026	Eukaryotic aspartyl protease		KO00500	Starch and sucrose metabolism
GO:0006412	translation		PF11807	Domain of unknown function (DUF3328)		KO04141	Protein processing in endoplasmic reticulum
GO:0000723	telomere maintenance		PF08030	Ferric reductase NAD binding domain		KO04113	Meiosis yeast
			PF12796	Ankyrin repeats (3 copies)
	Celular component		PF00646	F-box domain
GO:0005874	microtubule		PF00176	SNF2 family N-terminal domain
GO:0005622	intracellular		PF01048	Phosphorylase superfamily
GO:0005789	endoplasmic reticulum membrane
GO:0005576	extracellular region
GO:0005840	ribosome
	Molecular function
GO:0003777	microtubule motor activity
GO:0030246	carbohydrate binding
GO:0004672	protein kinase activity
GO:0008017	microtubule binding
GO:0003678	DNA helicase activity
GO:0003887	DNA-directed DNA polymerase activity
GO:0003684	damaged DNA binding
GO:0003735	structural constituent of ribosome
GO:0004674	protein serine/threonine kinase activity
GO:0022891	substrate-specific transmembrane transporter activity
GO:0004725	protein tyrosine phosphatase activity
GO:0046982	protein heterodimerization activity
GO:0004298	threonine-type endopeptidase activity
GO:0004553	hydrolase activity, hydrolyzing O-glycosyl compounds
GO:0004190	aspartic-type endopeptidase activity

## Sheet: Blastospores 
Fungus: Metarhizium anisopliae:Blastospores (liquid culture) vs Hyphae (solid culture)
	ENRICHED TERMS IN BLASTOSPORES
	GO – Gene ontology		PFAM – Protein family			ko Pathway
	Biological Process
GO:0006979	response to oxidative stress		PF04082	Fungal specific transcription factor domain		KO01110	Biosynthesis of secondary metabolites
GO:0008152	metabolic process		PF00153	Mitochondrial carrier protein		KO01100	Metabolic pathways
GO:0008299	isoprenoid biosynthetic process		PF00172	Fungal Zn(2)-Cys(6) binuclear cluster domain		KO01130	Biosynthesis of antibiotics
GO:0042254	ribosome biogenesis		PF00107	Zinc-binding dehydrogenase		KO01200	Carbon metabolism
GO:0006364	rRNA processing		PF00291	Pyridoxal-phosphate dependent enzyme		KO00020	Citrate cycle (TCA cycle)
GO:0055085	transmembrane transport		PF00175	Oxidoreductase NAD-binding domain		KO03008	Ribosome biogenesis in eukaryotes
GO:0006099	tricarboxylic acid cycle		PF08240	Alcohol dehydrogenase GroES-like domain		KO00190	Oxidative phosphorylation
GO:0006096	glycolytic process		PF03144	Elongation factor Tu domain 2		KO00071	Fatty acid degradation
GO:0015986	ATP synthesis coupled proton transport		PF07992	Pyridine nucleotide-disulphide oxidoreductase		KO00630	Glyoxylate and dicarboxylate metabolism
GO:0006351	transcription, DNA-templated		PF00173	Cytochrome b5-like Heme/Steroid binding domain		KO00620	Pyruvate metabolism
GO:0006338	chromatin remodeling		PF00076	RNA recognition motif. (a.k.a. RRM, RBD, or RNP domain)		KO00380	Tryptophan metabolism
GO:0006457	protein folding		PF00441	Acyl-CoA dehydrogenase, C-terminal domain		KO00010	Glycolysis / Gluconeogenesis
GO:0006396	RNA processing		PF02770	Acyl-CoA dehydrogenase, middle domain		KO01230	Biosynthesis of amino acids
GO:0019752	carboxylic acid metabolic process		PF00118	TCP-1/cpn60 chaperonin family		KO00350	Tyrosine metabolism
GO:0006520	cellular amino acid metabolic process		PF01494	FAD binding domain		KO00410	betaAlanine metabolism
			PF00248	Aldo/keto reductase family		KO00310	Lysine degradation
	Celular component		PF00067	Cytochrome P450		KO00280	Valine, leucine and isoleucine degradation
GO:0005730	nucleolus		PF00106	short chain dehydrogenase		KO01212	Fatty acid metabolism
GO:0005737	cytoplasm		PF00270	DEAD/DEAH box helicase		KO00650	Butanoate metabolism
GO:0005739	mitochondrion		PF12697	Alpha/beta hydrolase family		KO01210	2Oxocarboxylic acid metabolism
GO:0005743	mitochondrial inner membrane		PF02771	Acyl-CoA dehydrogenase, N-terminal domain		KO00270	Cysteine and methionine metabolism
GO:0005634	nucleus		PF00009	Elongation factor Tu GTP binding domain		KO00360	Phenylalanine metabolism
GO:0005852	eukaryotic translation initiation factor 3 complex		PF01565	FAD binding domain		KO04146	Peroxisome
GO:0019013	viral nucleocapsid		PF00010	Helix-loop-helix DNA-binding domain		KO00220	Arginine biosynthesis
GO:0030529	intracellular ribonucleoprotein complex		PF01370	NAD dependent epimerase/dehydratase family		KO00340	Histidine metabolism
			PF05368	NmrA-like family		KO00260	Glycine, serine and threonine metabolism
	Molecular function		PF00005	ABC transporter
GO:0000981	RNA polymerase II transcription factor activity, sequence-specific DNA binding		PF00082	Subtilase family
GO:0009055	electron carrier activity
GO:0020037	heme binding
GO:0051213	dioxygenase activity
GO:0003899	DNA-directed 5'-3' RNA polymerase activity
GO:0016491	oxidoreductase activity
GO:0048038	quinone binding
GO:0051537	2 iron, 2 sulfur cluster binding
GO:0051539	4 iron, 4 sulfur cluster binding
GO:0000287	magnesium ion binding
GO:0048037	cofactor binding
GO:0003746	translation elongation factor activity
GO:0003743	translation initiation factor activity
GO:0008080	N-acetyltransferase activity
GO:0003723	RNA binding
GO:0008168	methyltransferase activity
GO:0005506	iron ion binding
GO:0050661	NADP binding
GO:0046872	metal ion binding
GO:0010181	FMN binding
GO:0030170	pyridoxal phosphate binding
GO:0071949	FAD binding
GO:0051287	NAD binding
GO:0050660	flavin adenine dinucleotide binding
GO:0008270	zinc ion binding
GO:0003700	transcription factor activity, sequence-specific DNA binding
GO:0003824	catalytic activity
GO:0005215	transporter activity
GO:0005507	copper ion binding
GO:0015171	amino acid transmembrane transporter activity
GO:0016831	carboxy-lyase activity
GO:0016874	ligase activity
GO:0008483	transaminase activity
GO:0004497	monooxygenase activity
GO:0004386	helicase activity
GO:0016829	lyase activity
GO:0046983	protein dimerization activity
GO:0050662	coenzyme binding
GO:0003676	nucleic acid binding
GO:0016747	transferase activity, transferring acyl groups other than amino-acyl groups
GO:0003677	DNA binding
GO:0016627	oxidoreductase activity, acting on the CH-CH group of donors
GO:0016705	oxidoreductase activity, acting on paired donors, with incorporation or reduction of molecular oxygen
GO:0016614	oxidoreductase activity, acting on CH-OH group of donors
GO:0016616	oxidoreductase activity, acting on the CH-OH group of donors, NAD or NADP as acceptor
GO:0016887	ATPase activity

## Sheet: Overlap_Genes_assignGO_and_PFAM
Gene	Gene ontology IDs	Cross-reference (Pfam)
MAN_05148	GO:0000160; GO:0005622	PF00072;
MAN_05612	GO:0000271; GO:0016616; GO:0016628; GO:0051287	PF00984;PF03721;
MAN_06147	GO:0000287; GO:0003824; GO:0030976	PF02775;PF00205;PF02776;
MAN_07267	GO:0000287; GO:0003824; GO:0030976	PF02775;PF00205;PF02776;
MAN_08384	GO:0000287; GO:0016831; GO:0030976	PF02775;PF00205;PF02776;
MAN_00292	GO:0000287; GO:0016831; GO:0030976	PF02775;PF00205;PF02776;
MAN_10400	GO:0000770; GO:0005524; GO:0016021; GO:0042626	PF00664;PF00005;
MAN_01638	GO:0000770; GO:0005524; GO:0016021; GO:0042626	PF00664;PF00005;
MAN_07743	GO:0000770; GO:0005524; GO:0016021; GO:0042626	PF00664;PF00005;
MAN_05607	GO:0000770; GO:0005524; GO:0016021; GO:0042626	PF00664;PF00005;
MAN_01600	GO:0000770; GO:0005524; GO:0016021; GO:0042626	PF00664;PF00005;
MAN_06203	GO:0000981; GO:0003677; GO:0005634; GO:0006351; GO:0008270	PF04082;PF00172;
MAN_10836	GO:0000981; GO:0003677; GO:0005634; GO:0006351; GO:0008270	PF04082;PF00172;
MAN_01657	GO:0000981; GO:0003677; GO:0005634; GO:0008270	PF00172;
MAN_02593	GO:0000981; GO:0005634; GO:0008270	PF00172;
MAN_06573	GO:0000981; GO:0005634; GO:0008270	PF11951;
MAN_05749	GO:0000981; GO:0005634; GO:0008270	PF00172;
MAN_07862	GO:0003676; GO:0004386; GO:0005524	PF00270;PF00271;
MAN_10597	GO:0003676; GO:0046983	PF05699;
MAN_10841	GO:0003676; GO:0046983	PF05699;
MAN_10531	GO:0003677; GO:0005634; GO:0006351; GO:0006355; GO:0046983	PF00319;
MAN_07891	GO:0003677; GO:0005634; GO:0006351; GO:0008270	PF04082;
MAN_05693	GO:0003677; GO:0005634; GO:0006351; GO:0008270	PF04082;
MAN_05460	GO:0003677; GO:0046983	PF00010;
MAN_09977	GO:0003700	PF01285;
MAN_00697	GO:0003723	PF00076;
MAN_10267	GO:0003735; GO:0006412; GO:0015935	PF00164;
MAN_06323	GO:0003777; GO:0005524; GO:0007018; GO:0008017	PF00225;
MAN_06372	GO:0003824	PF03328;
MAN_06373	GO:0003824	PF02515;
MAN_03199	GO:0003824	PF02679;
MAN_05275	GO:0003824	PF07944;
MAN_01625	GO:0003824; GO:0008152	PF00857;
MAN_06364	GO:0003824; GO:0008152	PF00501;PF00668;PF00550;
MAN_09214	GO:0003824; GO:0008152	PF00501;PF00668;PF00550;
MAN_01071	GO:0003824; GO:0008152	PF00501;PF07993;PF00550;
MAN_05757	GO:0003824; GO:0008152	PF00501;PF13193;PF00668;PF00550;
MAN_09390	GO:0003824; GO:0008152; GO:0031177	PF00698;PF00501;PF00668;PF16197;PF00109;PF02801;PF08659;PF07993;PF00550;PF14765;
MAN_06024	GO:0003824; GO:0008152; GO:0031177	PF00501;PF00668;PF00550;
MAN_08857	GO:0003824; GO:0008152; GO:0031177	PF00501;PF00668;PF00550;
MAN_04624	GO:0003824; GO:0009116	PF13401;PF12796;PF01048;
MAN_07807	GO:0003824; GO:0009116	PF12894;PF00400;
MAN_03815	GO:0003824; GO:0009116	PF01048;
MAN_06562	GO:0003824; GO:0009116	PF00023;PF12796;PF01048;
MAN_06658	GO:0003824; GO:0009116	PF00023;PF12796;
MAN_10431	GO:0003824; GO:0009116; GO:0043531	PF00931;
MAN_00207	GO:0003824; GO:0009116; GO:0043531	PF00931;PF01048;
MAN_06176	GO:0003924; GO:0005525	PF01031;PF00350;
MAN_00654	GO:0003924; GO:0005525	PF01031;PF00350;
MAN_08569	GO:0003958; GO:0005506; GO:0010181; GO:0020037; GO:0070330	PF00667;PF00258;PF00175;PF00067;
MAN_07736	GO:0004084; GO:0009081	PF01063;
MAN_05231	GO:0004096; GO:0006979; GO:0020037	PF00199;
MAN_00866	GO:0004096; GO:0006979; GO:0020037; GO:0046872	PF00199;PF06628;PF01965;
MAN_00873	GO:0004146; GO:0006545; GO:0009165	PF00186;
MAN_06741	GO:0004177; GO:0004806; GO:0016042	PF03583;
MAN_05610	GO:0004190	PF00026;
MAN_02450	GO:0004190	PF00026;
MAN_04230	GO:0004190; GO:0030246	PF01828;
MAN_03008	GO:0004222	PF14521;
MAN_06000	GO:0004222; GO:0008270; GO:0031012	PF00413;PF01471;
MAN_06813	GO:0004252	PF00082;
MAN_06835	GO:0004252	PF05922;PF00082;
MAN_07684	GO:0004252	PF00089;
MAN_00098	GO:0004252	PF00089;
MAN_10272	GO:0004252	PF00089;
MAN_02755	GO:0004252	PF00089;
MAN_06309	GO:0004252; GO:0005618; GO:0016020	PF06280;PF00082;
MAN_02690	GO:0004252; GO:0005618; GO:0016020	PF06280;PF02225;PF00082;
MAN_07739	GO:0004312; GO:0042759	PF00109;PF02801;
MAN_07745	GO:0004318; GO:0005835; GO:0006633	PF00698;PF08354;PF01575;PF16073;
MAN_06367	GO:0004364; GO:0005737; GO:0008152	PF13417;
MAN_03629	GO:0004371; GO:0005524; GO:0006071	PF02733;PF02734;
MAN_01215	GO:0004386	PF15456;
MAN_10795	GO:0004411; GO:0006559; GO:0006570	PF04209;
MAN_04711	GO:0004451; GO:0019752	PF00463;
MAN_00003	GO:0004497	PF07992;
MAN_04588	GO:0004497; GO:0005506; GO:0016021; GO:0016705; GO:0020037	PF00067;
MAN_07738	GO:0004497; GO:0005506; GO:0016021; GO:0016705; GO:0020037	PF00067;
MAN_00907	GO:0004497; GO:0005506; GO:0016021; GO:0016705; GO:0020037	PF00067;
MAN_08933	GO:0004497; GO:0005506; GO:0016021; GO:0016705; GO:0020037	PF00067;
MAN_06578	GO:0004497; GO:0005506; GO:0016021; GO:0016705; GO:0020037	PF00067;
MAN_07848	GO:0004497; GO:0005506; GO:0016021; GO:0016705; GO:0020037	PF00067;
MAN_04589	GO:0004497; GO:0005506; GO:0016705; GO:0020037	PF00067;
MAN_09388	GO:0004497; GO:0005506; GO:0016705; GO:0020037	PF00067;
MAN_01655	GO:0004497; GO:0005506; GO:0016705; GO:0020037	PF00067;
MAN_09397	GO:0004497; GO:0005506; GO:0016705; GO:0020037	PF00067;
MAN_04597	GO:0004497; GO:0005506; GO:0016705; GO:0020037	PF00067;
MAN_02742	GO:0004497; GO:0005506; GO:0016705; GO:0020037	PF00067;
MAN_10677	GO:0004497; GO:0005506; GO:0016705; GO:0020037	PF00067;
MAN_07482	GO:0004497; GO:0005506; GO:0016705; GO:0020037	PF00067;
MAN_07837	GO:0004497; GO:0005506; GO:0016705; GO:0020037	PF00067;
MAN_06023	GO:0004497; GO:0005506; GO:0016705; GO:0020037	PF00067;
MAN_06375	GO:0004497; GO:0005506; GO:0016705; GO:0020037	PF00067;
MAN_05606	GO:0004497; GO:0005506; GO:0016705; GO:0020037	PF00067;
MAN_03562	GO:0004497; GO:0005506; GO:0016705; GO:0020037	PF00067;
MAN_07526	GO:0004497; GO:0005506; GO:0016705; GO:0020037	PF00067;
MAN_06382	GO:0004497; GO:0005506; GO:0016705; GO:0020037	PF00067;
MAN_09184	GO:0004497; GO:0005506; GO:0016705; GO:0020037	PF00067;
MAN_06320	GO:0004497; GO:0005506; GO:0016705; GO:0020037	PF00067;
MAN_04590	GO:0004497; GO:0009820; GO:0016765	PF11991;
MAN_04562	GO:0004497; GO:0016021; GO:0071949	PF01494;
MAN_04596	GO:0004497; GO:0071949	PF01494;
MAN_06201	GO:0004497; GO:0071949	PF01494;
MAN_08978	GO:0004497; GO:0071949	PF01494;PF07976;
MAN_09384	GO:0004499; GO:0050660; GO:0050661	PF00743;PF08242;
MAN_06331	GO:0004499; GO:0050660; GO:0050661	PF00743;
MAN_06696	GO:0004499; GO:0050660; GO:0050661	PF00743;
MAN_02681	GO:0004525; GO:0006396	PF00636;
MAN_10673	GO:0004527	PF03372;
MAN_01263	GO:0004553; GO:0005975	PF00722;
MAN_04259	GO:0004553; GO:0005975	PF00232;
MAN_06105	GO:0004553; GO:0005975; GO:0008061	PF00704;
MAN_03626	GO:0004553; GO:0005975; GO:0016740	PF00722;
MAN_00671	GO:0004553; GO:0005975; GO:0030246	PF00722;PF01822;
MAN_03416	GO:0004553; GO:0005975; GO:0030246	PF00722;
MAN_09869	GO:0004565; GO:0005975	PF10435;PF13363;PF13364;PF01301;
MAN_04148	GO:0004571; GO:0005509; GO:0008152; GO:0016020	PF01532;
MAN_06014	GO:0004587; GO:0030170	PF00202;
MAN_05746	GO:0004601	PF01328;
MAN_07354	GO:0004601; GO:0005506; GO:0006979; GO:0016705; GO:0020037; GO:0031408	PF03098;PF00067;
MAN_05745	GO:0004601; GO:0006979; GO:0020037; GO:0031408	PF03098;
MAN_04599	GO:0004609; GO:0008654	PF02666;
MAN_01543	GO:0004609; GO:0008654	PF02666;PF12588;
MAN_04444	GO:0004612; GO:0005524; GO:0006094; GO:0016301	PF01293;
MAN_06296	GO:0004622; GO:0009395	PF01735;
MAN_09257	GO:0004623; GO:0006644; GO:0050482	PF09056;
MAN_07829	GO:0004668; GO:0005509; GO:0005737; GO:0018101	PF03068;
MAN_04171	GO:0004668; GO:0009446	PF04371;
MAN_06249	GO:0004668; GO:0009446	PF04371;
MAN_02451	GO:0004668; GO:0009446	PF04371;
MAN_05329	GO:0004672; GO:0005524	PF01636;
MAN_07734	GO:0004672; GO:0005524	PF12796;PF00069;
MAN_03630	GO:0004751; GO:0005975	PF02502;
MAN_03631	GO:0004807; GO:0006094; GO:0006096; GO:0006098	PF00121;
MAN_01665	GO:0004812; GO:0005524; GO:0006418	PF00152;
MAN_09258	GO:0004814; GO:0005524; GO:0006420	PF05746;PF00750;
MAN_09803	GO:0004830; GO:0005524; GO:0005737; GO:0006436	PF00579;
MAN_08777	GO:0005089; GO:0035023	PF00621;
MAN_05576	GO:0005199; GO:0009277	PF01185;
MAN_03526	GO:0005215; GO:0008289	PF00061;
MAN_08965	GO:0005215; GO:0016021; GO:0055085	PF02133;
MAN_06745	GO:0005344; GO:0016491; GO:0020037; GO:0046872	PF00042;PF00175;
MAN_07984	GO:0005506; GO:0005737; GO:0019310; GO:0050113	PF05153;
MAN_06377	GO:0005506; GO:0008610; GO:0016021; GO:0016491	PF04116;
MAN_01589	GO:0005506; GO:0016021; GO:0016705; GO:0020037	PF00067;
MAN_00022	GO:0005506; GO:0016021; GO:0016705; GO:0020037	PF00067;
MAN_03057	GO:0005506; GO:0016021; GO:0016705; GO:0020037	PF00067;
MAN_01937	GO:0005506; GO:0016021; GO:0016705; GO:0020037	PF00067;
MAN_04666	GO:0005506; GO:0016705; GO:0020037	PF00067;
MAN_04581	GO:0005506; GO:0016705; GO:0020037	PF00067;
MAN_04566	GO:0005506; GO:0016705; GO:0020037	PF00067;
MAN_06286	GO:0005506; GO:0016712; GO:0020037	PF00067;
MAN_07121	GO:0005507; GO:0008131; GO:0009308; GO:0048038	PF01179;PF02727;PF02728;
MAN_10477	GO:0005507; GO:0016491	PF00394;PF07731;PF07732;
MAN_06358	GO:0005507; GO:0016491	PF00394;PF07731;PF07732;
MAN_09378	GO:0005507; GO:0016491	PF00394;PF07731;PF07732;
MAN_09254	GO:0005507; GO:0016491	PF00394;PF07731;PF07732;
MAN_09095	GO:0005524	PF00271;PF00176;
MAN_10506	GO:0005524; GO:0006040; GO:0009254; GO:0016773	PF03702;
MAN_07645	GO:0005524; GO:0008716; GO:0046872	PF07478;
MAN_09472	GO:0005524; GO:0015986; GO:0045261; GO:0046933	PF00006;PF02874;
MAN_10467	GO:0005524; GO:0015991; GO:0016820; GO:0033180; GO:0046034	PF00006;PF02874;
MAN_07764	GO:0005524; GO:0016020; GO:0016301; GO:0016773	PF06293;
MAN_08210	GO:0005524; GO:0016021; GO:0016787	PF00689;PF00690;
MAN_10468	GO:0005524; GO:0016021; GO:0042626	PF00664;PF00005;
MAN_07863	GO:0005576	PF00188;
MAN_05949	GO:0005576; GO:0009405	PF09044;
MAN_08277	GO:0005576; GO:0016021	PF00188;
MAN_01997	GO:0005622; GO:0032366	PF02221;
MAN_00297	GO:0005737; GO:0006569; GO:0009435; GO:0030170; GO:0030429	PF00266;
MAN_03144	GO:0005774; GO:0006865; GO:0006914; GO:0016021	PF11700;
MAN_01080	GO:0005886; GO:0016021; GO:0016740; GO:0031225	PF03198;PF07983;
MAN_10405	GO:0005975	PF00704;
MAN_10487	GO:0005975	PF00704;
MAN_02125	GO:0005975; GO:0008061	PF00704;
MAN_03993	GO:0005975; GO:0016853; GO:0030246	PF01263;
MAN_09438	GO:0006021; GO:0008934; GO:0046854; GO:0046855; GO:0046872; GO:0052832; GO:0052833	PF00459;
MAN_02210	GO:0006147; GO:0008270; GO:0008892	PF01979;
MAN_10541	GO:0006355	PF03101;PF10551;
MAN_06369	GO:0006629; GO:0016021	PF00487;
MAN_06443	GO:0006629; GO:0016787	PF01764;
MAN_01712	GO:0006631; GO:0016491; GO:0050151; GO:0071949	PF06100;
MAN_09226	GO:0006725; GO:0008199; GO:0016702	PF00775;
MAN_08598	GO:0006809; GO:0020037; GO:0030151; GO:0042128; GO:0043546; GO:0050464	PF00173;PF00970;PF03404;PF00175;PF00174;
MAN_05608	GO:0006810; GO:0016021	PF00153;
MAN_10560	GO:0006950; GO:0016021	PF04479;
MAN_10567	GO:0006950; GO:0016021	PF04479;
MAN_07737	GO:0006950; GO:0016021	PF04479;
MAN_10627	GO:0008152; GO:0008484; GO:0016021	PF00884;
MAN_09456	GO:0008152; GO:0008484; GO:0016021	PF00884;
MAN_01935	GO:0008152; GO:0016021; GO:0016740	PF01663;
MAN_09812	GO:0008152; GO:0016740	PF00698;PF00109;PF02801;PF08242;PF00550;PF16073;
MAN_01651	GO:0008152; GO:0016740; GO:0031177	PF00698;PF00501;PF00668;PF16197;PF00109;PF02801;PF08659;PF08242;PF07993;PF00550;PF14765;
MAN_09465	GO:0008152; GO:0016740; GO:0031177	PF00698;PF16197;PF00109;PF02801;PF08659;PF08242;PF00550;PF14765;
MAN_00814	GO:0008152; GO:0016758	PF00201;
MAN_06161	GO:0008152; GO:0016787	PF07859;
MAN_04806	GO:0008152; GO:0016788	PF04185;
MAN_07878	GO:0008152; GO:0016829	PF00701;
MAN_04614	GO:0008152; GO:0016853	PF00378;
MAN_09385	GO:0008152; GO:0016874	PF16177;PF00501;PF13193;
MAN_01587	GO:0008152; GO:0016874	PF00501;PF00668;PF00550;
MAN_06015	GO:0008152; GO:0016874	PF00501;
MAN_09380	GO:0008171	PF00891;
MAN_07915	GO:0008171	PF00891;
MAN_02072	GO:0008171	PF00891;
MAN_09693	GO:0008236	PF05577;
MAN_01639	GO:0008236	PF09286;
MAN_01922	GO:0008236	PF05577;
MAN_10647	GO:0008237	PF05572;
MAN_09173	GO:0008237	PF05572;
MAN_06046	GO:0008237	PF05572;
MAN_05751	GO:0008237; GO:0016805; GO:0046872	PF01244;
MAN_08864	GO:0008270	PF12796;
MAN_06149	GO:0008270; GO:0016021; GO:0016491	PF08240;PF00107;
MAN_00026	GO:0008270; GO:0016491	PF08240;PF00107;
MAN_04592	GO:0008299; GO:0016740	PF00348;
MAN_04594	GO:0008299; GO:0016740	PF00348;
MAN_01976	GO:0008410; GO:0046952	PF01144;
MAN_06066	GO:0008496; GO:0016021; GO:0016052	PF03663;
MAN_04169	GO:0008610	PF02353;
MAN_07857	GO:0008643; GO:0016021; GO:0022891	PF00083;
MAN_01083	GO:0008757	PF05724;
MAN_04367	GO:0008942; GO:0020037; GO:0042128; GO:0050660; GO:0050661; GO:0051537	PF04324;PF01077;PF03460;PF07992;PF00355;
MAN_03025	GO:0009058; GO:0016740; GO:0030170	PF00155;
MAN_06022	GO:0009058; GO:0016740; GO:0030170	PF00155;
MAN_01619	GO:0009058; GO:0016788	PF00550;PF00975;
MAN_10475	GO:0009058; GO:0016788; GO:0031177	PF00698;PF00109;PF02801;PF00550;PF14765;PF16073;PF00975;
MAN_05697	GO:0009820; GO:0016765	PF11991;
MAN_08053	GO:0009916; GO:0016021; GO:0046872; GO:0070469	PF01786;
MAN_06055	GO:0015171; GO:0016021	PF13520;
MAN_03818	GO:0015171; GO:0016021	PF13520;
MAN_09295	GO:0015171; GO:0016021	PF13520;
MAN_07802	GO:0015171; GO:0016021	PF13520;
MAN_05324	GO:0015238; GO:0015297; GO:0016021	PF01554;
MAN_10031	GO:0016021	PF00023;PF12796;
MAN_07731	GO:0016021	PF08592;
MAN_07730	GO:0016021	PF08592;
MAN_06789	GO:0016021	PF01284;
MAN_04152	GO:0016021	PF01490;
MAN_00291	GO:0016021	PF01988;
MAN_09408	GO:0016021	PF12505;
MAN_08351	GO:0016021	PF10348;PF10355;
MAN_07380	GO:0016021	PF05730;
MAN_00131	GO:0016021	PF01988;
MAN_05884	GO:0016021	PF08592;
MAN_06390	GO:0016021	PF13813;
MAN_06065	GO:0016021	PF06011;PF14558;
MAN_03067	GO:0016021	PF01124;
MAN_06409	GO:0016021	PF11578;
MAN_01652	GO:0016021	PF08592;
MAN_05515	GO:0016021	PF11915;
MAN_01667	GO:0016021	PF14518;
MAN_08934	GO:0016021	PF00106;
MAN_01926	GO:0016021	PF00026;
MAN_00156	GO:0016021	PF05686;
MAN_09530	GO:0016021	PF01184;
MAN_04587	GO:0016021	PF00106;
MAN_10490	GO:0016021	PF12505;
MAN_08709	GO:0016021	PF00168;
MAN_07483	GO:0016021; GO:0016491; GO:0020037; GO:0046872	PF00173;PF00970;PF00175;
MAN_06141	GO:0016021; GO:0016628	PF01222;
MAN_07916	GO:0016021; GO:0016740	PF04488;
MAN_01932	GO:0016021; GO:0016740	PF01755;
MAN_09398	GO:0016021; GO:0016765	PF01040;
MAN_09810	GO:0016021; GO:0016765	PF01040;
MAN_07732	GO:0016021; GO:0016787	PF00135;
MAN_06069	GO:0016021; GO:0020037; GO:0046872	PF00173;
MAN_10507	GO:0016021; GO:0022857	PF00083;
MAN_06327	GO:0016021; GO:0043386	PF11807;
MAN_06324	GO:0016021; GO:0043386	PF11807;
MAN_09757	GO:0016021; GO:0055085	PF07690;
MAN_00742	GO:0016021; GO:0055085	PF07690;
MAN_07308	GO:0016021; GO:0055085	PF07690;
MAN_02969	GO:0016021; GO:0055085	PF00153;
MAN_02779	GO:0016021; GO:0055085	PF07690;
MAN_00269	GO:0016021; GO:0055085	PF00153;
MAN_03647	GO:0016021; GO:0055085	PF07690;
MAN_07136	GO:0016021; GO:0055085	PF07690;
MAN_02412	GO:0016021; GO:0055085	PF07690;
MAN_10205	GO:0016021; GO:0055085	PF07690;
MAN_09186	GO:0016021; GO:0055085	PF07690;
MAN_00283	GO:0016021; GO:0055085	PF07690;
MAN_10832	GO:0016021; GO:0055085	PF07690;
MAN_05752	GO:0016021; GO:0055085	PF07690;
MAN_10474	GO:0016021; GO:0055085	PF07690;
MAN_00007	GO:0016021; GO:0055085	PF07690;
MAN_06657	GO:0016021; GO:0055085	PF07690;
MAN_02715	GO:0016021; GO:0055085	PF07690;
MAN_00554	GO:0016021; GO:0055085	PF07690;
MAN_00823	GO:0016021; GO:0055085	PF07690;
MAN_01938	GO:0016021; GO:0055085	PF07690;
MAN_06283	GO:0016021; GO:0055085	PF07690;
MAN_07523	GO:0016021; GO:0055085	PF07690;
MAN_10204	GO:0016021; GO:0055085	PF07690;
MAN_02955	GO:0016021; GO:0055085	PF07690;
MAN_08584	GO:0016301	PF05922;
MAN_09182	GO:0016301	PF01636;
MAN_01654	GO:0016491	PF00171;
MAN_03213	GO:0016491	PF07992;
MAN_09802	GO:0016491	PF00171;
MAN_06253	GO:0016491	PF00107;
MAN_07357	GO:0016491	PF01593;
MAN_09799	GO:0016491	PF01266;
MAN_06371	GO:0016491	PF01593;
MAN_03821	GO:0016491	PF00171;
MAN_06560	GO:0016491	PF04820;
MAN_00005	GO:0016491	PF01266;
MAN_08855	GO:0016491	PF01593;
MAN_05758	GO:0016491	PF07992;
MAN_00002	GO:0016491	PF01593;
MAN_05771	GO:0016491	PF01593;
MAN_05704	GO:0016491; GO:0020037	PF00042;PF00175;
MAN_01934	GO:0016491; GO:0031177	PF00698;PF08240;PF16197;PF00109;PF02801;PF08659;PF00550;PF14765;
MAN_10660	GO:0016491; GO:0046872	PF00264;
MAN_07646	GO:0016491; GO:0046872	PF00264;
MAN_06017	GO:0016491; GO:0046872	PF03171;PF14226;
MAN_01666	GO:0016491; GO:0046872	PF03171;PF14226;
MAN_06146	GO:0016614; GO:0050660	PF01565;
MAN_09808	GO:0016614; GO:0050660	PF08031;PF01565;
MAN_07669	GO:0016614; GO:0050660	PF05199;PF00732;
MAN_07620	GO:0016614; GO:0050660	PF01565;
MAN_04617	GO:0016614; GO:0050660	PF05199;PF00732;
MAN_02928	GO:0016614; GO:0050660	PF00732;
MAN_09183	GO:0016614; GO:0050660	PF05199;PF00732;
MAN_02992	GO:0016614; GO:0050660	PF08031;PF01565;
MAN_01603	GO:0016657; GO:0034599	PF00881;
MAN_09381	GO:0016740	PF00043;PF02798;
MAN_07196	GO:0016740	PF04646;
MAN_03776	GO:0016740	PF02353;
MAN_06019	GO:0016740	PF00266;
MAN_05753	GO:0016740	PF00043;PF13417;
MAN_01920	GO:0016740	PF04488;
MAN_10396	GO:0016740	PF01636;
MAN_03200	GO:0016740; GO:0016853	PF02547;
MAN_04017	GO:0016746	PF00755;
MAN_07836	GO:0016747	PF02458;
MAN_09391	GO:0016787	PF12697;
MAN_01650	GO:0016787	PF12697;
MAN_02739	GO:0016787	PF06500;
MAN_06614	GO:0016787	PF00135;
MAN_00667	GO:0016787	PF03663;
MAN_03001	GO:0016787	PF01738;
MAN_07362	GO:0016787	PF00135;
MAN_03668	GO:0016810	PF07969;
MAN_09734	GO:0016813; GO:0046872	PF00491;
MAN_06016	GO:0016829	PF03328;
MAN_03028	GO:0016831; GO:0019752; GO:0030170	PF00282;
MAN_04558	GO:0016866	PF13243;PF13249;
MAN_06376	GO:0018580; GO:0051213	PF03060;
MAN_00296	GO:0020037; GO:0051213	PF01231;
MAN_06636	GO:0030246	PF07938;
MAN_06556	GO:0030246	PF07472;
MAN_09377	GO:0031177	PF08242;PF00550;
MAN_06325	GO:0043386	PF11807;
MAN_03024	GO:0046872; GO:0051213	PF03171;PF14226;
MAN_09395	GO:0051213	PF05721;
MAN_09394	GO:0051213	PF05721;
MAN_04947	GO:0051213	PF02668;
MAN_06020	GO:0051213	PF02668;
MAN_03026	GO:0051213	PF05721;
MAN_06366	GO:0051213	PF02668;
MAN_06378	GO:0051287; GO:0055114	PF02826;
